# Supplementary material for: Revealing the epigenetic effect of temozolomide on glioblastoma cell lines in therapeutic conditions
Source: PubMed Central journal article supplement (PMC7043761; doi:10.1371/journal.pone.0229534), 2020-02-26
Supplement: pone.0229534.s001.pdf [file pone.0229534.s001.pdf]

**S1 Table. Results of total 5-methylcytosine (m<sup>5</sup>C) contents (R) analysis in DNA of glioblastoma (U138, T98G, U118) and HaCaT cell lines after 3, 12, 24 and 48 hours (T, time) of incubation in a given TMZ concentration [μM].**

Numeric data (R) are followed with SD and p values (one-tailed t-test, comparison with the control – DMSO, \*p < 0,05, \*\*p < 0,01, \*\*\*p < 0,001).

| TMZ<br>[μM] | T<br>[h] | T98G  |       |        | U138  |       |        | U118  |       |        | HaCaT |       |        |
|-------------|----------|-------|-------|--------|-------|-------|--------|-------|-------|--------|-------|-------|--------|
|             |          | R     | SD    | p      | R     | SD    | p      | R     | SD    | p      | R     | SD    | p      |
| 0 (DMSO)    | 3        | 0,722 | 0,080 |        | 0,750 | 0,056 |        | 0,576 | 0,026 |        | 0,699 | 0,035 |        |
| 0,5         | 3        | 0,632 | 0,014 | **     | 0,634 | 0,028 | ***    | 0,541 | 0,029 | p>0,05 | 0,683 | 0,047 | p>0,05 |
| 1,0         | 3        | 0,637 | 0,021 | *      | 0,657 | 0,039 | ***    | 0,575 | 0,034 | p>0,05 | 0,676 | 0,024 | p>0,05 |
| 3,0         | 3        | 0,620 | 0,016 | **     | 0,683 | 0,043 | **     | 0,633 | 0,047 | p>0,05 | 0,761 | 0,013 | **     |
| 5,0         | 3        | 0,717 | 0,053 | p>0,05 | 0,736 | 0,061 | p>0,05 | 0,656 | 0,072 | p>0,05 | 0,854 | 0,031 | **     |
| 10          | 3        | 0,751 | 0,068 | p>0,05 | 0,781 | 0,037 | p>0,05 | 0,655 | 0,045 | **     | 0,919 | 0,083 | ***    |
| 20          | 3        | 0,797 | 0,040 | *      | 0,816 | 0,015 | **     | 0,685 | 0,049 | *      | 0,971 | 0,043 | ***    |
| 30          | 3        | 0,847 | 0,041 | **     | 0,818 | 0,043 | **     | 0,714 | 0,028 | **     | 0,987 | 0,073 | ***    |
| 50          | 3        | 0,894 | 0,050 | ***    | 0,825 | 0,052 | p>0,05 | 0,722 | 0,035 | **     | 0,996 | 0,029 | ***    |
| 100         | 3        | 0,888 | 0,047 | ***    | 0,837 | 0,016 | ***    | 0,755 | 0,057 | *      | 1,004 | 0,021 | ***    |
| 0 (DMSO)    | 12       | 0,747 | 0,061 |        | 0,727 | 0,061 |        | 0,471 | 0,041 |        | 0,691 | 0,074 |        |
| 0,5         | 12       | 0,599 | 0,060 | *      | 0,562 | 0,037 | ***    | 0,426 | 0,046 | p>0,05 | 0,734 | 0,024 | p>0,05 |
| 1,0         | 12       | 0,631 | 0,022 | ***    | 0,575 | 0,077 | *      | 0,408 | 0,016 | **     | 0,655 | 0,044 | p>0,05 |
| 3,0         | 12       | 0,669 | 0,032 | *      | 0,599 | 0,041 | **     | 0,485 | 0,030 | p>0,05 | 0,696 | 0,027 | p>0,05 |
| 5,0         | 12       | 0,683 | 0,012 | *      | 0,682 | 0,014 | *      | 0,492 | 0,020 | p>0,05 | 0,757 | 0,037 | p>0,05 |
| 10          | 12       | 0,738 | 0,039 | p>0,05 | 0,707 | 0,044 | p>0,05 | 0,531 | 0,061 | *      | 0,843 | 0,036 | **     |
| 20          | 12       | 0,768 | 0,024 | p>0,05 | 0,769 | 0,012 | p>0,05 | 0,593 | 0,067 | *      | 0,904 | 0,039 | **     |
| 30          | 12       | 0,815 | 0,054 | p>0,05 | 0,777 | 0,016 | *      | 0,620 | 0,010 | ***    | 0,957 | 0,057 | ***    |

|          |    |       |       |        |       |       |        |       |       |        |       |       |        |
|----------|----|-------|-------|--------|-------|-------|--------|-------|-------|--------|-------|-------|--------|
| 50       | 12 | 0,846 | 0,038 | **     | 0,781 | 0,042 | p>0,05 | 0,633 | 0,056 | *      | 0,965 | 0,038 | ***    |
| 100      | 12 | 0,847 | 0,032 | **     | 0,772 | 0,013 | *      | 0,656 | 0,030 | ***    | 1,006 | 0,038 | ***    |
| 0 (DMSO) | 24 | 0,720 | 0,050 |        | 0,718 | 0,047 |        | 0,521 | 0,067 |        | 0,711 | 0,032 |        |
| 0,5      | 24 | 0,603 | 0,051 | **     | 0,578 | 0,028 | ***    | 0,477 | 0,062 | p>0,05 | 0,679 | 0,038 | p>0,05 |
| 1,0      | 24 | 0,587 | 0,040 | **     | 0,551 | 0,042 | ***    | 0,501 | 0,018 | p>0,05 | 0,677 | 0,026 | *      |
| 3,0      | 24 | 0,584 | 0,028 | ***    | 0,588 | 0,025 | ***    | 0,533 | 0,056 | p>0,05 | 0,702 | 0,042 | p>0,05 |
| 5,0      | 24 | 0,631 | 0,016 | ***    | 0,607 | 0,041 | ***    | 0,577 | 0,016 | *      | 0,780 | 0,016 | **     |
| 10       | 24 | 0,671 | 0,041 | *      | 0,685 | 0,059 | p>0,05 | 0,620 | 0,073 | *      | 0,821 | 0,066 | ***    |
| 20       | 24 | 0,708 | 0,058 | p>0,05 | 0,699 | 0,052 | p>0,05 | 0,645 | 0,081 | p>0,05 | 0,880 | 0,043 | ***    |
| 30       | 24 | 0,726 | 0,031 | p>0,05 | 0,713 | 0,037 | p>0,05 | 0,656 | 0,006 | **     | 0,905 | 0,049 | ***    |
| 50       | 24 | 0,768 | 0,018 | *      | 0,714 | 0,026 | p>0,05 | 0,665 | 0,015 | **     | 0,974 | 0,027 | ***    |
| 100      | 24 | 0,777 | 0,053 | p>0,05 | 0,732 | 0,021 | p>0,05 | 0,729 | 0,031 | ***    | 0,978 | 0,036 | ***    |
| 0 (DMSO) | 48 | 0,750 | 0,042 |        | 0,730 | 0,071 |        | 0,533 | 0,058 |        | 0,718 | 0,046 |        |
| 0,5      | 48 | 0,597 | 0,011 | ***    | 0,580 | 0,025 | ***    | 0,426 | 0,030 | **     | 0,700 | 0,040 | p>0,05 |
| 1,0      | 48 | 0,585 | 0,025 | ***    | 0,545 | 0,022 | ***    | 0,471 | 0,066 | p>0,05 | 0,655 | 0,053 | *      |
| 3,0      | 48 | 0,582 | 0,047 | **     | 0,576 | 0,045 | ***    | 0,385 | 0,013 | ***    | 0,737 | 0,039 | p>0,05 |
| 5,0      | 48 | 0,594 | 0,014 | ***    | 0,574 | 0,028 | ***    | 0,381 | 0,030 | ***    | 0,812 | 0,059 | *      |
| 10       | 48 | 0,591 | 0,054 | ***    | 0,614 | 0,038 | **     | 0,359 | 0,020 | ***    | 0,858 | 0,056 | ***    |
| 20       | 48 | 0,584 | 0,008 | ***    | 0,640 | 0,026 | **     | 0,335 | 0,013 | ***    | 0,904 | 0,056 | **     |
| 30       | 48 | 0,591 | 0,038 | **     | 0,653 | 0,053 | *      | 0,337 | 0,004 | ***    | 0,952 | 0,042 | ***    |
| 50       | 48 | 0,601 | 0,011 | ***    | 0,653 | 0,032 | *      | 0,325 | 0,032 | ***    | 0,948 | 0,066 | ***    |
| 100      | 48 | 0,601 | 0,041 | ***    | 0,669 | 0,037 | *      | 0,311 | 0,060 | **     | 1,012 | 0,043 | ***    |
