# Supplementary material for: Revealing the epigenetic effect of temozolomide on glioblastoma cell lines in therapeutic conditions
Source: PubMed Central journal article supplement (PMC7043761; doi:10.1371/journal.pone.0229534), 2020-02-26
Supplement: pone.0229534.s002.pdf [file pone.0229534.s002.pdf]

**S2 Table. Results of total 5-methylcytosine (m<sup>5</sup>C) contents (R) analysis in DNA of glioblastoma (U138, T98G, U118) and HaCaT cell lines subject to 5-day TMZ administration scheme.**

Glioblastoma (U138, T98G, U118) and HaCaT cell lines were treated for 5 days with daily repeated TMZ doses [ $\mu$ M]. After 24, 48, 72 and 96 hrs cells were washed with PBS and placed in fresh medium with indicated TMZ concentrations. The total DNA methylation was estimated after 5<sup>th</sup> day of treatment. Numeric data (R) are followed with SD and p value (one-tailed t-test, comparison with the control – DMSO, \*p < 0,05, \*\*p < 0,01, \*\*\*p < 0,001).

| TMZ<br>[ $\mu$ M] | T<br>[days] | T98G  |       |     | U138  |       |     | U118  |       |        | HaCaT |       |    |
|-------------------|-------------|-------|-------|-----|-------|-------|-----|-------|-------|--------|-------|-------|----|
|                   |             | R     | SD    | p   | R     | SD    | p   | R     | SD    | p      | R     | SD    | p  |
| 0 (DMSO)          | 5           | 0,396 | 0,008 |     | 0,428 | 0,020 |     | 0,421 | 0,052 |        | 0,400 | 0,053 |    |
| 0,5               | 5           | 0,432 | 0,022 | *   | 0,456 | 0,012 | **  | 0,445 | 0,025 | p>0,05 | 0,467 | 0,030 | *  |
| 1,0               | 5           | 0,486 | 0,040 | **  | 0,457 | 0,017 | *   | 0,529 | 0,050 | **     | 0,475 | 0,032 | *  |
| 3,0               | 5           | 0,572 | 0,052 | *** | 0,491 | 0,007 | *** | 0,538 | 0,017 | *      | 0,509 | 0,033 | ** |
| 5,0               | 5           | 0,650 | 0,023 | *** | 0,560 | 0,020 | *** | 0,589 | 0,024 | *      | 0,514 | 0,019 | ** |
| 10                | 5           | 0,699 | 0,030 | *** | 0,617 | 0,013 | *** | 0,660 | 0,029 | **     | 0,509 | 0,022 | ** |
