# Supplementary material for: Revealing the epigenetic effect of temozolomide on glioblastoma cell lines in therapeutic conditions
Source: PubMed Central journal article supplement (PMC7043761; doi:10.1371/journal.pone.0229534), 2020-02-26
Supplement: pone.0229534.s003.pdf [file pone.0229534.s003.pdf]

**S3 Table. Total 5-methylcytosine (m<sup>5</sup>C) contents (R) in DNA of glioblastoma (U138, T98G, U118) and HaCaT cell lines after 1-7 days (T, time) of incubation with a given single dose of TMZ [ $\mu$ M].**

The total DNA methylation was estimated after 1<sup>st</sup>, 2<sup>nd</sup>, 3<sup>rd</sup>, 4<sup>th</sup>, 5<sup>th</sup>, 6<sup>th</sup>, and 7<sup>th</sup> day of incubation. Numeric data (R) are followed with SD and p values (one-tailed t-test, \*p < 0,05, \*\*p < 0,01, \*\*\*p < 0,001).

| TMZ<br>[ $\mu$ M] | T<br>[days] | T98G  |       |        | U138  |       |        | U118  |       |        | HaCaT |       |        |
|-------------------|-------------|-------|-------|--------|-------|-------|--------|-------|-------|--------|-------|-------|--------|
|                   |             | R     | SD    | p      | R     | SD    | p      | R     | SD    | p      | R     | SD    | p      |
| 0 (DMSO)          | 1           | 0,725 | 0,013 |        | 0,722 | 0,051 |        | 0,575 | 0,014 |        | 0,722 | 0,033 |        |
| 0,5               | 1           | 0,676 | 0,016 | *      | 0,678 | 0,023 | p>0,05 | 0,676 | 0,045 | *      | 0,666 | 0,039 | *      |
| 1,0               | 1           | 0,694 | 0,058 | p>0,05 | 0,661 | 0,038 | p>0,05 | 0,738 | 0,041 | **     | 0,681 | 0,072 | p>0,05 |
| 3,0               | 1           | 0,737 | 0,051 | p>0,05 | 0,721 | 0,031 | p>0,05 | 0,764 | 0,040 | **     | 0,681 | 0,067 | p>0,05 |
| 5,0               | 1           | 0,861 | 0,059 | **     | 0,801 | 0,027 | *      | 0,816 | 0,024 | ***    | 0,720 | 0,053 | p>0,05 |
| 10                | 1           | 0,897 | 0,038 | ***    | 0,877 | 0,052 | **     | 0,863 | 0,036 | ***    | 0,757 | 0,044 | p>0,05 |
| 0 (DMSO)          | 2           | 0,714 | 0,044 |        | 0,731 | 0,014 |        | 0,526 | 0,021 |        | 0,722 | 0,034 |        |
| 0,5               | 2           | 0,684 | 0,023 | p>0,05 | 0,672 | 0,053 | p>0,05 | 0,575 | 0,034 | p>0,05 | 0,681 | 0,028 | p>0,05 |
| 1,0               | 2           | 0,660 | 0,031 | p>0,05 | 0,648 | 0,048 | *      | 0,622 | 0,050 | *      | 0,685 | 0,063 | p>0,05 |
| 3,0               | 2           | 0,679 | 0,067 | p>0,05 | 0,692 | 0,026 | *      | 0,619 | 0,058 | p>0,05 | 0,695 | 0,041 | p>0,05 |
| 5,0               | 2           | 0,743 | 0,027 | p>0,05 | 0,756 | 0,066 | p>0,05 | 0,655 | 0,027 | **     | 0,695 | 0,056 | p>0,05 |
| 10                | 2           | 0,820 | 0,053 | *      | 0,816 | 0,047 | **     | 0,740 | 0,060 | **     | 0,741 | 0,023 | p>0,05 |
| 0 (DMSO)          | 3           | 0,715 | 0,028 |        | 0,717 | 0,043 |        | 0,538 | 0,019 |        | 0,706 | 0,029 |        |
| 0,5               | 3           | 0,630 | 0,019 | **     | 0,683 | 0,041 | p>0,05 | 0,608 | 0,012 | **     | 0,678 | 0,025 | *      |
| 1,0               | 3           | 0,688 | 0,011 | p>0,05 | 0,645 | 0,046 | p>0,05 | 0,663 | 0,007 | ***    | 0,725 | 0,058 | p>0,05 |
| 3,0               | 3           | 0,712 | 0,037 | p>0,05 | 0,670 | 0,017 | p>0,05 | 0,682 | 0,054 | *      | 0,703 | 0,020 | p>0,05 |
| 5,0               | 3           | 0,746 | 0,060 | p>0,05 | 0,726 | 0,026 | p>0,05 | 0,724 | 0,041 | **     | 0,704 | 0,026 | p>0,05 |
| 10                | 3           | 0,757 | 0,043 | p>0,05 | 0,788 | 0,023 | p>0,05 | 0,739 | 0,034 | ***    | 0,679 | 0,069 | p>0,05 |

|          |   |       |       |        |       |       |        |       |       |        |       |       |        |
|----------|---|-------|-------|--------|-------|-------|--------|-------|-------|--------|-------|-------|--------|
| 0 (DMSO) | 4 | 0,711 | 0,028 |        | 0,724 | 0,029 |        | 0,521 | 0,011 |        | 0,724 | 0,009 |        |
| 0,5      | 4 | 0,687 | 0,029 | p>0,05 | 0,641 | 0,057 | p>0,05 | 0,512 | 0,074 | p>0,05 | 0,655 | 0,031 | *      |
| 1,0      | 4 | 0,667 | 0,031 | *      | 0,632 | 0,024 | *      | 0,558 | 0,017 | *      | 0,679 | 0,016 | *      |
| 3,0      | 4 | 0,699 | 0,021 | p>0,05 | 0,643 | 0,013 | **     | 0,597 | 0,017 | **     | 0,676 | 0,017 | *      |
| 5,0      | 4 | 0,777 | 0,010 | *      | 0,741 | 0,065 | p>0,05 | 0,628 | 0,103 | p>0,05 | 0,725 | 0,020 | p>0,05 |
| 10       | 4 | 0,810 | 0,030 | **     | 0,802 | 0,026 | p>0,05 | 0,717 | 0,045 | **     | 0,719 | 0,006 | p>0,05 |
| 0 (DMSO) | 5 | 0,708 | 0,046 |        | 0,719 | 0,071 |        | 0,563 | 0,030 |        | 0,721 | 0,041 |        |
| 0,5      | 5 | 0,661 | 0,081 | p>0,05 | 0,635 | 0,016 | p>0,05 | 0,576 | 0,053 | p>0,05 | 0,677 | 0,049 | p>0,05 |
| 1,0      | 5 | 0,619 | 0,031 | *      | 0,589 | 0,071 | *      | 0,584 | 0,075 | p>0,05 | 0,721 | 0,030 | p>0,05 |
| 3,0      | 5 | 0,657 | 0,065 | p>0,05 | 0,654 | 0,049 | p>0,05 | 0,618 | 0,061 | p>0,05 | 0,720 | 0,046 | p>0,05 |
| 5,0      | 5 | 0,710 | 0,055 | p>0,05 | 0,698 | 0,015 | p>0,05 | 0,678 | 0,009 | **     | 0,742 | 0,035 | p>0,05 |
| 10       | 5 | 0,726 | 0,050 | p>0,05 | 0,744 | 0,006 | p>0,05 | 0,776 | 0,020 | ***    | 0,761 | 0,031 | p>0,05 |
| 0 (DMSO) | 6 | 0,719 | 0,032 |        | 0,731 | 0,027 |        | 0,549 | 0,041 |        | 0,693 | 0,033 |        |
| 0,5      | 6 | 0,664 | 0,019 | *      | 0,664 | 0,072 | p>0,05 | 0,524 | 0,019 | p>0,05 | 0,664 | 0,054 | p>0,05 |
| 1,0      | 6 | 0,674 | 0,021 | *      | 0,615 | 0,019 | **     | 0,517 | 0,014 | p>0,05 | 0,633 | 0,038 | p>0,05 |
| 3,0      | 6 | 0,663 | 0,019 | *      | 0,679 | 0,023 | p>0,05 | 0,581 | 0,017 | p>0,05 | 0,653 | 0,042 | p>0,05 |
| 5,0      | 6 | 0,736 | 0,043 | p>0,05 | 0,699 | 0,050 | p>0,05 | 0,584 | 0,047 | p>0,05 | 0,636 | 0,035 | p>0,05 |
| 10       | 6 | 0,776 | 0,040 | *      | 0,750 | 0,054 | p>0,05 | 0,641 | 0,033 | *      | 0,640 | 0,033 | p>0,05 |
| 0 (DMSO) | 7 | 0,718 | 0,030 |        | 0,725 | 0,041 |        | 0,550 | 0,015 |        | 0,717 | 0,039 |        |
| 0,5      | 7 | 0,672 | 0,028 | p>0,05 | 0,679 | 0,045 | p>0,05 | 0,557 | 0,011 | p>0,05 | 0,655 | 0,076 | p>0,05 |
| 1,0      | 7 | 0,639 | 0,008 | *      | 0,599 | 0,054 | p>0,05 | 0,565 | 0,038 | p>0,05 | 0,678 | 0,030 | p>0,05 |
| 3,0      | 7 | 0,626 | 0,022 | *      | 0,563 | 0,044 | **     | 0,500 | 0,048 | p>0,05 | 0,662 | 0,040 | p>0,05 |
| 5,0      | 7 | 0,596 | 0,040 | *      | 0,516 | 0,052 | *      | 0,449 | 0,029 | **     | 0,623 | 0,012 | *      |
| 10       | 7 | 0,469 | 0,029 | ***    | 0,452 | 0,049 | **     | 0,431 | 0,040 | **     | 0,622 | 0,063 | p>0,05 |
